# Supplementary material for: cd1 Mutation in Drosophila Affects Phenoxazinone Synthase Catalytic Site and Impairs Long-Term Memory
Source: MDPI journal article supplement (doi:10.3390/ijms232012356), 2022-10-15
Supplement: s1 [file s1]

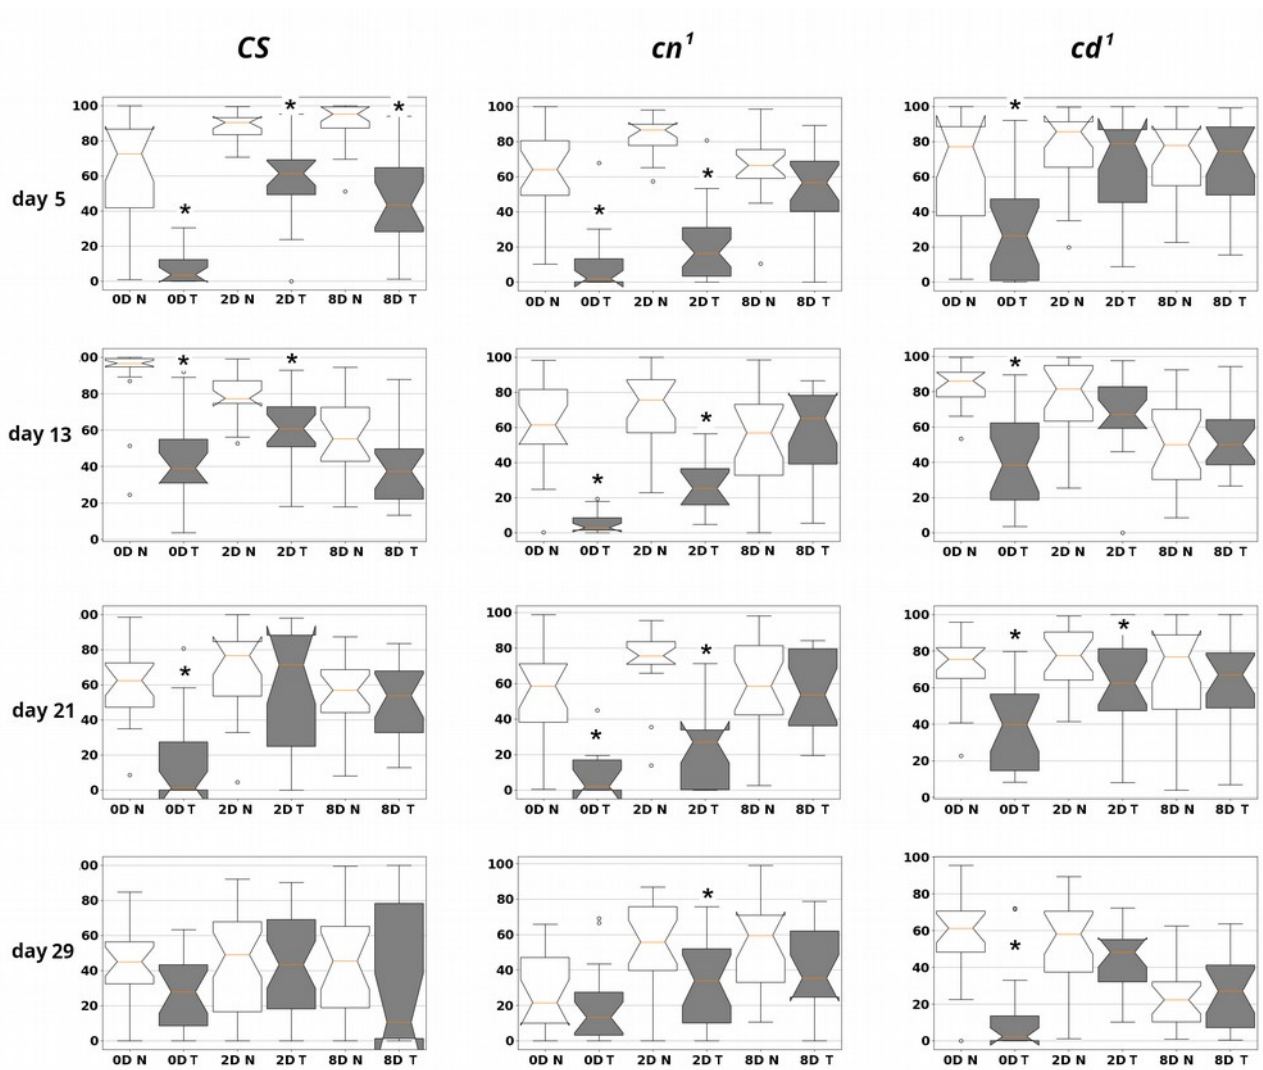

**Figure S3. Age-dependent changes in courtship indices of kynurenine mutants.**

N – naive flies, T – trained flies. X axis: days, Y axis: courtship indices (CI), %. Box and whisker plots are shown. 0D – immediately after training (learning), 2D – 2 days after training, 8D – 8 days after training. Median is shown by the orange line. Outliers are shown by dots. Statistical differences: \* T from N of the same group (0D, 2D or 8D) (two-sided randomization test;  $p < 0.05$ ,  $n = 20$ ).
