# Supplementary material for: cd1 Mutation in Drosophila Affects Phenoxazinone Synthase Catalytic Site and Impairs Long-Term Memory
Source: MDPI journal article supplement (doi:10.3390/ijms232012356), 2022-10-15
Supplement: s1 [file s1]

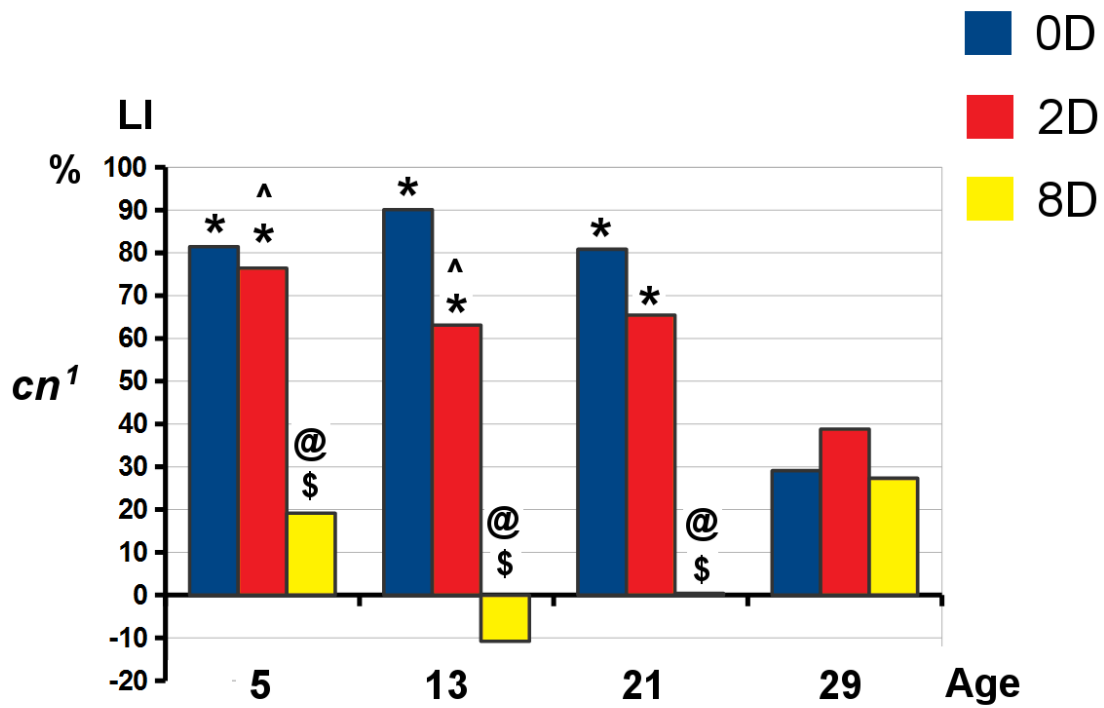

**Figure S4. Learning and long-term memory abilities of *cn<sup>1</sup>* mutant.**

X axis: the age where training was performed (days), Y axis: learning indices (LI), %. 0D – immediately after training (learning), 2D – 2 days after training, 8D – 8 days after training. Statistical differences: ^ from *cd<sup>1</sup>*; \$ from 0D; @ from 2D; \* from zero (two-sided randomization test;  $p < 0.05$ ,  $n = 20$ ).
