# Supplementary material for: cd1 Mutation in Drosophila Affects Phenoxazinone Synthase Catalytic Site and Impairs Long-Term Memory
Source: MDPI journal article supplement (doi:10.3390/ijms232012356), 2022-10-15
Supplement: s1 [file s1]

Text S3. Analysis of *cd* expression: primers sequences and amplicons location.

|              | Forward (f)               | Reverse (r)             | Length | Location (bp)* |
|--------------|---------------------------|-------------------------|--------|----------------|
| <i>rpl32</i> | TATGCTAAGCTGTCGCACAAATGGC | GTTCTGCATGAGCAGGACCTCCA | 195    | 365 – 559      |
| <i>cd</i>    | CACGTGGGAGGAGATGTCAC      | CCACATCCTGCGGAGATTCA    | 99     | 416 – 1181     |

\*Location (amplicon borders) is given relative to the point of *cd* start (3R:22694959, =1).

Real time polymerase chain reaction parameters

1. 95 °C – 5': 1 cycle.
2. 95 °C – 15", 62/58 °C (*rpl32/phs*) – 15", 72 °C – 30", 83/78 °C (*rpl32/phs*) – 15" (detection): 40 cycles.
3. Melting curve analysis.
