# Supplementary material for: cd1 Mutation in Drosophila Affects Phenoxazinone Synthase Catalytic Site and Impairs Long-Term Memory
Source: MDPI journal article supplement (doi:10.3390/ijms232012356), 2022-10-15
Supplement: s1 [file s1]

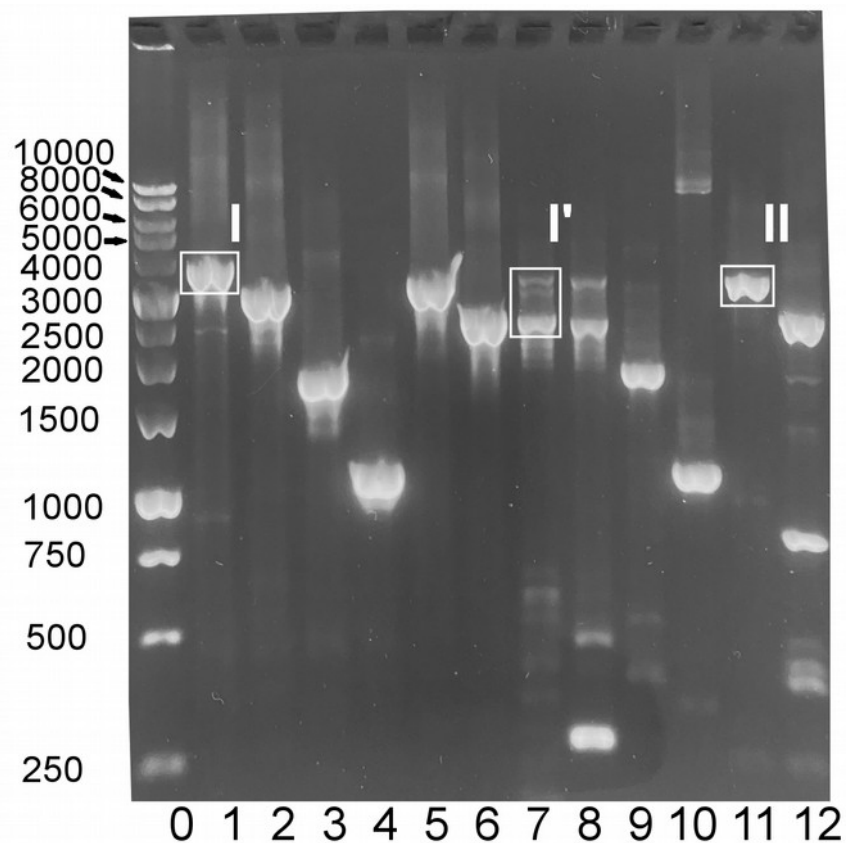

**Figure S1. *cd* amplicons: PCR analysis.**

0. 1 kb ladder.

Strains: 1 – 6: *CS*; 7 – 12: *cd<sup>l</sup>*.

**Primer pairs:**

1: 1f – 7r (amplicon I for *CS*).

7: 8f – 7r (amplicon I for *cd<sup>l</sup>*).

2, 8: 8f – 6r.

3, 9: 5f – 7r.

4, 10: 5f – 6r.

5, 11: 2f – 7r (amplicon II for *cd<sup>l</sup>*).

6, 12: 2f – 6r.
