# Supplementary material for: cd1 Mutation in Drosophila Affects Phenoxazinone Synthase Catalytic Site and Impairs Long-Term Memory
Source: MDPI journal article supplement (doi:10.3390/ijms232012356), 2022-10-15
Supplement: s1 [file s1]

|           |     |            |            |            |             |            |            |            |
|-----------|-----|------------|------------|------------|-------------|------------|------------|------------|
| reference | 1   | MTDEITPLTD | AVPSGSGYVV | LPPYQGPERV | FPGGVSPRAR  | RNKMRFQCC  | MGITFIAIVF | TALCLALVFS |
| carinal   |     | MTDEITPLTD | AVPSGSGYVV | LPPYQGPERV | FPGGVSPRAR  | RNKMRFQCC  | MGITFIAIVF | TALCLALVFS |
| reference | 71  | DSLGGADGGP | SFFVVGSD   | SELAPNRPLP | DEPAAEWALQ  | QAALGHHDGA | QAVSAGIKAL | GDREILEEGL |
| carinal   |     | DSLGGADGGP | SFFVVGSD   | SELAPNRPLP | DEPAAEWALQ  | QAALGHHDGA | QAVSAGIKAL | GDREILEEGL |
| reference | 141 | QPNENVTPSF | RHYRSLSTNP | EARKLARRGY | VENQATIDIA  | KRFNYTKQPG | RSNIGWGPKI | VLPDPTVLRL |
| carinal   |     | QPNENVTPSF | RHYRSLSTNP | EARKLARRGY | VENQATIDIA  | KRFNYTKQPG | RSNIGWGPKI | VLPDPTVLRL |
| reference | 211 | ECDFNARYRR | STGVCNNKQH | PRTYGASMVP | YRRMVSPDYA  | DGIAAPRVSH | HGRLPPARQV | SLKIHRSSYE |
| carinal   |     | ECDFNARYRR | STGVCNNKQH | PRTYGASMVP | YRRMVSPDYA  | DGIAAPRVSH | HGRLPPARQV | SLKIHRSSYE |
| reference | 281 | TDSNFTVMLA | VFGQFMDHDI | TATSLTTSQE | GESIDCCVAA  | TREQHPECYP | VDILPDDPYY | KQYNISCMNF |
| carinal   |     | TDSNFTVMLA | VFGQFMDHDI | TATSLTTSQE | GESIDCCVAA  | TREQHPECYP | VDILPDDPYY | KQYNISCMNF |
| reference | 351 | VRSAPAPTGR | FGPRMQLNQA | TAFIDASVYV | GNLEQRONQL  | RSFINGSLRM | FVTDDGRQLL | PISSNPADGC |
| carinal   |     | VRSAPAPTGR | FGPRMQLNQA | TAFIDASVYV | GNLEQRONQL  | RSFINGSLRM | FVTDDGRQLL | PISSNPADGC |
| reference | 421 | NRVQMTRLGK | YCFESGDDRA | NENLLLTSMH | LLWARHHNYL  | AROLQEQNP  | WEDERLYQEA | RKILGAQMAH |
| carinal   |     | NRVQMTRLGK | YCFESGDDRA | NENLLLTSMH | LLWARHHNYL  | AROLQEQNP  | WEDERLYQEA | RKILGAQMAH |
| reference | 491 | ITYNEFLPV  | LGKNISEAKG | LLPAKHNLNA | PDTYDPEVDP  | SIANCFAAAA | FRFAHTLLPG | LFNISRDNST |
| carinal   |     | ITYNEFLPV  | LGKNISEAKG | LLPAKHNLNA | PDTYDPAILA  | LGGAWH     |            |            |
| reference | 561 | PEAIELHKML | FNPFSLWAEH | GIDHALMTAA | NTPVMQVDRF  | FSLEVTQKLF | EGTAEDRVPL | CGLDLVSLNI |
| carinal   |     | PEAIELHKML | FNPFSLWAEH | GIDHALMTAA | NTPVMQVDRF  | FSLEVTQKLF | EGTAEDRVPL | CGLDLVSLNI |
| reference | 631 | QGRDHGIPS  | YFVFRRHCR  | PTVDTWEEMS | QAIDNATLDS  | IRQIYESPOD | VDVYTGALSE | PPLDGAIFGP |
| carinal   |     | QGRDHGIPS  | YFVFRRHCR  | PTVDTWEEMS | QAIDNATLDS  | IRQIYESPOD | VDVYTGALSE | PPLDGAIFGP |
| reference | 701 | LLSCMVSDQF | LRLKLGDSHW | YERKMGPQKF | TKAQLAEIYK  | TSLAAILCRN | SDGITRVREH | VMQRLRDGGN |
| carinal   |     | LLSCMVSDQF | LRLKLGDSHW | YERKMGPQKF | TKAQLAEIYK  | TSLAAILCRN | SDGITRVREH | VMQRLRDGGN |
| reference | 771 | PHVDCODLEG | FHFNFEPWSE | KQOPQDLHSA | GISRGSSTSVR | VMSKANHQAH | NVTLHIDKGI |            |
| carinal   |     | PHVDCODLEG | FHFNFEPWSE | KQOPQDLHSA | GISRGSSTSVR | VMSKANHQAH | NVTLHIDKGI |            |

**Figure S2. Alignment of the reference and *cd'* (amplicon III) PHS protein sequences.**
