# Supplementary material for: cd1 Mutation in Drosophila Affects Phenoxazinone Synthase Catalytic Site and Impairs Long-Term Memory
Source: MDPI journal article supplement (doi:10.3390/ijms232012356), 2022-10-15
Supplement: s1 [file s1]

Text S1. Sequencing of *cd*: primers sequences and amplicons locations.

| N  | Forward (f)           | Reverse (r)           | Length | Location (bp)* |
|----|-----------------------|-----------------------|--------|----------------|
| 1  | GACAGTTGCCTGCCTTGTTG  | TGGTTAGCATGCTGCGGTTA  | 660    | -156 – 503     |
| 2  | AATTTGCCATCCCCCTCCATT | TCAGAGAGACCTGACGAGCC  | 766    | 416 – 1181     |
| 3  | GTTCTGCCAGATCCTACGGT  | TGCTCCAGATTGCCGTACAC  | 554    | 965 – 1518     |
| 4  | GTTCTGCCAGATCCTACGGT  | AGGTGATGTGTGCCATCTGA  | 503    | 1339 – 1841    |
| 5  | TGCTGTGGGCTAGACATCAC  | GTATGCCATGATCCCGACCC  | 564    | 1716 – 2279    |
| 6  | GCAGAGGATAGGGTGCCTCT  | TCCCTCACTCGGGTGATTCC  | 554    | 2204 – 2757    |
| 7  | AGGTGACTCCCATTTGGTACG | AAATCCACCCTTTCTCTGCGA | 842    | 2566 – 3407    |
| 8  | TCTTGACGGTGGACAGTTG   | GAAGGACGGCGTATTCACCT  | 983    | -168 – 814     |
| 9  | TTAAGGCACTGGGAGATCGG  | TCTGCCGGATTCGAGGAAAT  | 874    | 744 – 1617     |
| 10 | TCTGCCCCGATGATCCCTACT | TGATCCCGACCCCTCTGAAT  | 909    | 1363 – 2271    |
| 11 | TGATGCAAGTGGATCGCTTCT | GGTTACGTTGTGGGCTTGATG | 806    | 2145 – 2950    |
| 12 | TCTTGACGGTGGACAGTTG^  | CGTATCCGCCATTCTCGCTA  | 6234   | -168 – 6065    |

N – the number of amplicon. ^ For N12, the forward primer is the same as for N8.

\*Location (amplicon borders) is given relative to the point of *cd* start (3R:22694959, =1).

Polymerase chain reaction parameters

1. 95 °C – 3 min: 1 cycle.
  2. 95 °C – 20", 61 °C – 30", 68 °C – X': 2 cycles.
  3. 95 °C – 20", 59 °C – 30", 68 °C – X': 2 cycles
  4. 95 °C – 20", 57 °C – 30", 68 °C – X': 2 cycles
  5. 95 °C – 20", 55 °C – 30", 68 °C – X': 38 cycles.
  6. 68 °C – 10 min: 1 cycle.
  7. 4 °C.
- X = 1; 4 (for 1f – 7r, 8f – 8r, 2f – 7r); 11 (for 8f – 12r).
