# Supplementary material for: cd1 Mutation in Drosophila Affects Phenoxazinone Synthase Catalytic Site and Impairs Long-Term Memory
Source: MDPI journal article supplement (doi:10.3390/ijms232012356), 2022-10-15
Supplement: s1 [file s1]

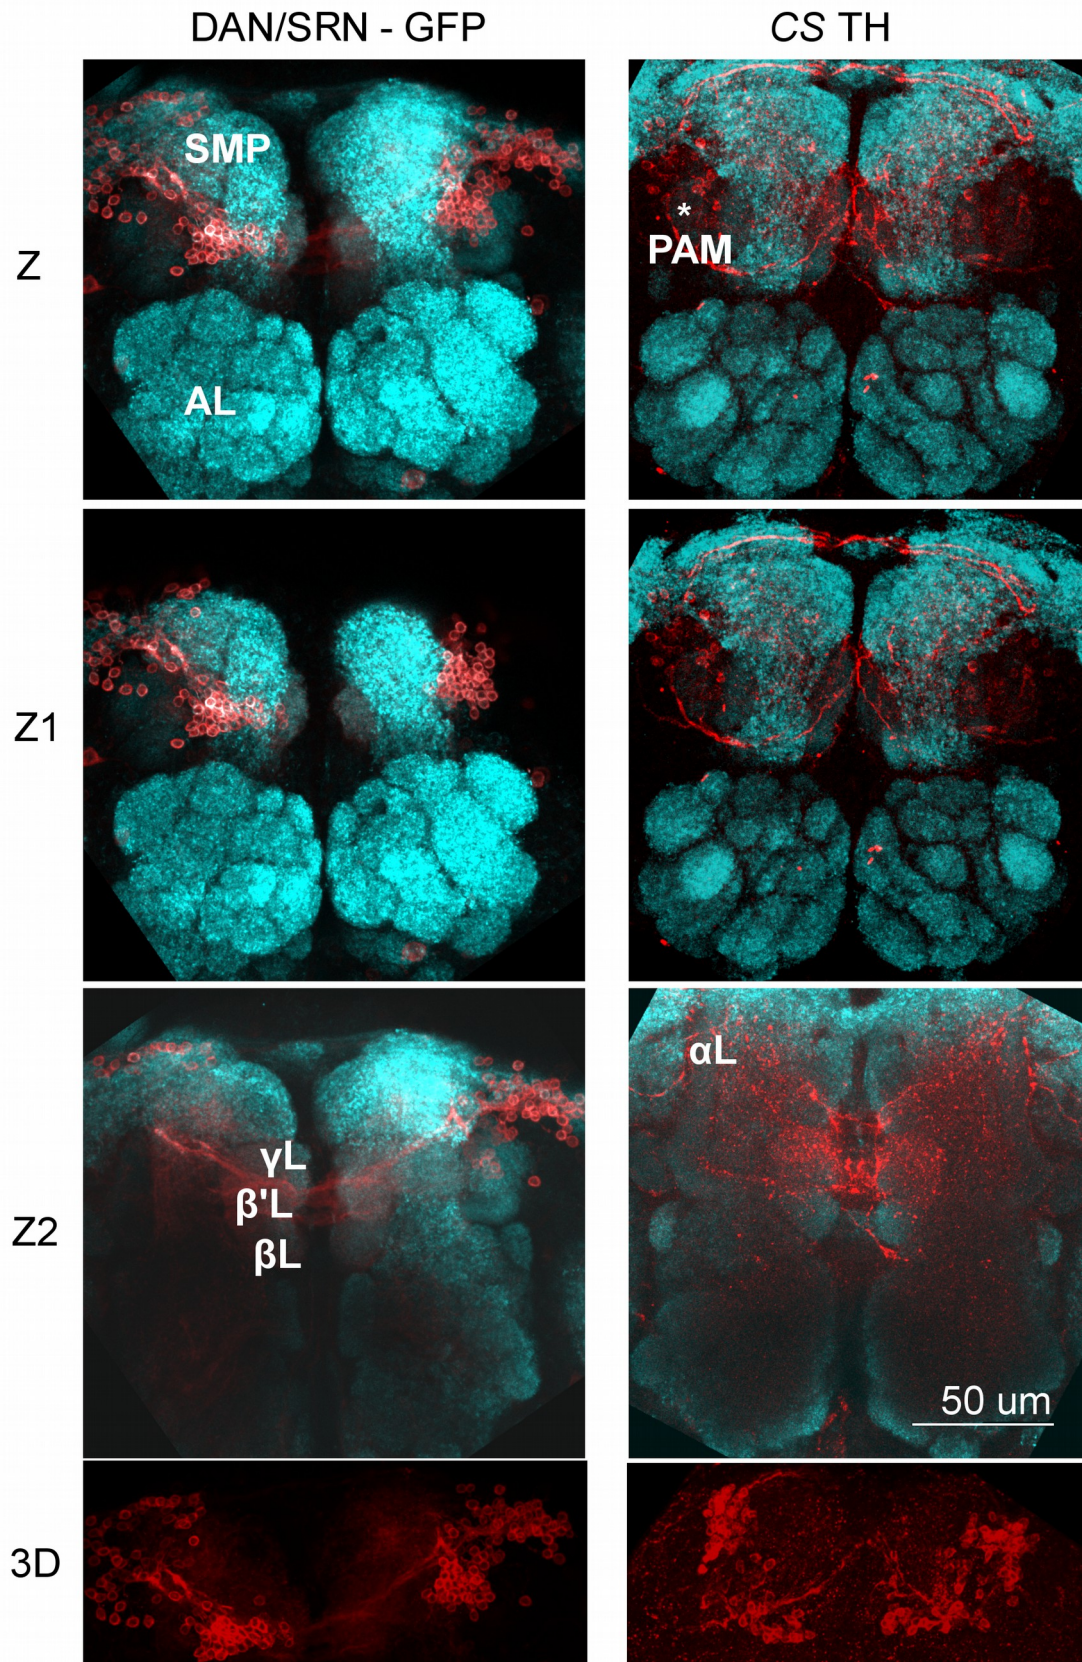

**Figure S5. PAM neurons in the *Drosophila* brain.**

DAN/SER – GFP: GFP signal in 7009 > 32186 strain (DAN and SRN); TH – tyrosine hydroxylase. Z – Z-projection (Z1 + Z2). 3D – the spatial reconstruction of PAM clusters (\*). Color scheme: cyan – CSP, red – GFP or TH. See also the list of abbreviations.
